# Supplementary material
Source: MDPI journal article supplement (https://www.mdpi.com/2304-6732/10/4/396)
Supplement: s1 [file s1]

# Supplementary Material of Improved Classification of Blurred Images with Deep Learning Networks Using Lucy-Richardson-Rosen Algorithm

Amudhavel Jayavel <sup>1,†</sup>, Shivasubramanian Gopinath <sup>1,†</sup>, Praveen Periyasamy Angamuthu <sup>1,†</sup>, Francis Gracy Arockiaraj <sup>1</sup>, Andrei Bleahu <sup>1</sup>, Agnes Pristy Ignatius Xavier <sup>1</sup>, Daniel Smith <sup>2</sup>, Molong Han <sup>2</sup>, Ivan Slobozhan <sup>3</sup>, Soon Hock Ng <sup>2</sup>, Tomas Katkus <sup>2</sup>, Aravind Simon John Francis Rajeswary <sup>1</sup>, Rajesh Sharma <sup>3</sup>, Saulius Juodkazis <sup>2,4</sup> and Vijayakumar Anand <sup>1,2,\*</sup>

- <sup>1</sup> Institute of Physics, University of Tartu, W. Ostwaldi 1, 50411 Tartu, Estonia; amudhavel.jayavel@ut.ee (A.J.); shivasubramanian.gopinath@ut.ee (S.G.); praveen@ut.ee (P.P.A.); francis.gracy.arockiaraj@ut.ee (F.G.A.); andrei-ioan.bleahu@ut.ee (A.B.); agnes.pristy.ignatius.xavier@ut.ee (A.P.I.X.); aravind@ut.ee (A.S.J.F.R.)
- <sup>2</sup> Optical Sciences Center, Swinburne University of Technology, Melbourne 3122, Australia; danielsmith@swin.edu.au (D.S.); molonghan@swin.edu.au (M.H.); soonhockng@swin.edu.au (S.H.N.); tkatkus@swin.edu.au (T.K.); sjuodkazis@swin.edu.au (S.J.)
- <sup>3</sup> Institute of Computer Science, University of Tartu, 51009 Tartu, Estonia; ivan.slobozhan@ut.ee (I.S.); rajesh.sharma@ut.ee (R.S.)
- <sup>4</sup> Tokyo Tech World Research Hub Initiative (WRHI), School of Materials and Chemical Technology, Tokyo Institute of Technology, 2-12-1, Ookayama, Meguro-ku, Tokyo 152-8550, Japan
- \* Correspondence: vijayakumar.anand@ut.ee (V.A.)
- † These authors contributed equally to this work.

## Deep Learning Pre-Trained Networks (DLPTN) used in this study

| S. No | Pre-Trained Model | Acronym |
|-------|-------------------|---------|
| 1     | DARKNET53         | DN53    |
| 2     | EFFICIENTNETB0    | EFNETB0 |
| 3     | INCEPTIONRESNETV2 | IRV2    |
| 4     | NASNETLARGE       | NNL     |
| 5     | NASNETMOBILE      | NNMB    |
| 6     | RESNET101         | RS101   |
| 7     | RESNET50          | RN50    |
| 8     | DARKNET53         | DN53    |
| 9     | EFFICIENTNETB0    | EFNETB0 |
| 10    | INCEPTIONRESNETV2 | IRV2    |
| 11    | NASNETMOBILE      | NNMB    |
| 12    | RESNET101         | RS101   |
| 13    | RESNET50          | RN50    |
| 14    | EFFICIENTNETB0    | EFNETB0 |
| 15    | INCEPTIONRESNETV2 | IRV2    |
| 16    | NASNETLARGE       | NNL     |
| 17    | RESNET101         | RS101   |
| 18    | RESNET50          | RN50    |

**Citation:** To be added by editorial staff during production.

Received: date

Revised: date

Accepted: date

Published: date

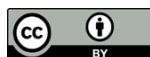

**Copyright:** © 2023 by the authors. Submitted for possible open access publication under the terms and conditions of the Creative Commons Attribution (CC BY) license (<https://creativecommons.org/licenses/by/4.0/>).

In the supplementary section, a different approach was used to evaluate the performance of LR<sup>2</sup>A with respect to LRA and NLR. In the main document, the classification probability was obtained for different cases and compared. In the supplementary section, all the above 18 DLPTNs were used for different cases of aberrations and the total number of

successful classification of “Bell pepper” by the pre-trained deep-learning networks were calculated. This number of successful classification is called hits.

### Deep Learning Experiments

The supplementary section encapsulates the outcomes of an investigative trial wherein the imaging condition was perturbed by shifting the object distance (Delta) in millimeters, and the hit count was documented. For every Delta value, the mean, standard deviation (STD), minimum (Min), lower quartile (LQ), middle quartile (MQ) or median, upper quartile (UQ), and maximum (Max) hit count was counted. The values were calculated by the conventional descriptive statistical analysis method.

Here, D-25, D-50, D-75, D-100 represent the different axial aberration values ( $\Delta z$ ) ranging from 25 mm to 100 mm with an increment of 25 mm. The values corresponding to the different radii of the aperture ranges from 50 pixels to 300 pixels with the increment of 25 pixels. The design wavelengths associated with the axial aberration ranges from 400 nm to 700 nm with the increment of 50 nm.

**Table S1:** Statistical Analysis of Delta Values with respect to NLR

| $\Delta z$ | Hits | Mean | STD  | Min | LQ   | MQ   | UQ   | Max  |
|------------|------|------|------|-----|------|------|------|------|
| D-25       | 64   | 21.2 | 11.2 | 5.6 | 12   | 19.5 | 31   | 37.8 |
| D-50       | 96   | 18.3 | 7.3  | 8.6 | 10.9 | 17.2 | 24.8 | 29   |
| D-75       | 152  | 20.2 | 16.5 | 7.1 | 8.2  | 12.3 | 26.6 | 59   |
| D-100      | 248  | 25.1 | 23.8 | 6.8 | 9.4  | 10.1 | 55.4 | 73   |

These statistical findings in Figs. S1-S4 reveal a collection of the hit values for each deblurring methodologies. The statistical analysis from Table S1, 2, and 3 shows that the NLR method gained the most meager mean hit value of 140, sporting a broad standard deviation of 72.53. The hit values ranged from 64 to 248, with the first quartile (Q1) at 80, the median at 124, and the third quartile (Q3) at 184. The LRA method had a more noteworthy mean hit value of 228, along with a reduced standard deviation of 35.47. The hit values ranged from 176 to 272, with Q1 at 192, median at 232, and Q3 at 256. The LR<sup>2</sup>A method had the most impressive mean hit value of 250. The hit values ranged from 240 to 256, with Q1 at 248, median at 248, and Q3 at 256.

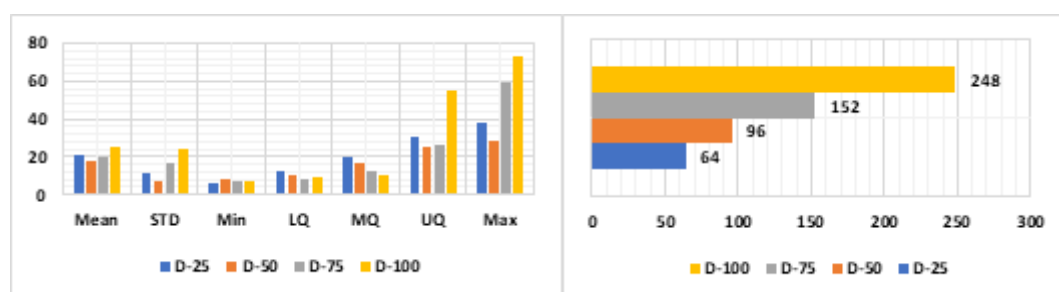

**Figure S1:** Performance Comparison of Delta/No. of Hits.r.t NLR

**Table S2:** Statistical Analysis of Delta Values with respect to LRA

| $\Delta z$ | Hits | Mean | STD  | Min  | LQ   | MQ   | UQ   | Max  |
|------------|------|------|------|------|------|------|------|------|
| D-25       | 176  | 37.1 | 24.9 | 11.2 | 17.4 | 22.7 | 60.6 | 80.3 |
| D-50       | 208  | 39.7 | 26.6 | 7.4  | 14.4 | 32.2 | 75.3 | 83   |

|       |     |      |      |      |      |      |      |      |
|-------|-----|------|------|------|------|------|------|------|
| D-75  | 256 | 43.6 | 26.5 | 12.8 | 16.7 | 38.9 | 78.8 | 82.9 |
| D-100 | 272 | 41.3 | 26.7 | 13.3 | 15.2 | 37.2 | 78.6 | 81.8 |

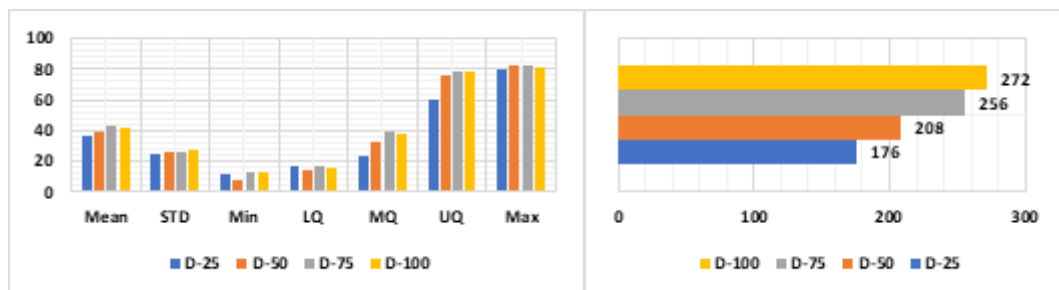

Figure S2: Performance Comparison of Delta/No. of Hits.r.t LRA

Table S3: Statistical Analysis of Delta Values with respect to LR<sup>2</sup>A

| $\Delta z$ | Hits | Mean | STD  | Min  | LQ   | MQ   | UQ   | Max  |
|------------|------|------|------|------|------|------|------|------|
| D-25       | 240  | 38   | 24.6 | 7.9  | 17   | 31.7 | 56.9 | 84.7 |
| D-50       | 256  | 41.9 | 27.4 | 8.4  | 15.4 | 35.2 | 75.5 | 86.7 |
| D-75       | 256  | 37.1 | 26.5 | 9.3  | 13.1 | 31.2 | 66.9 | 82.1 |
| D-100      | 248  | 37.4 | 26.1 | 10.6 | 12.8 | 32.4 | 74.6 | 81.1 |

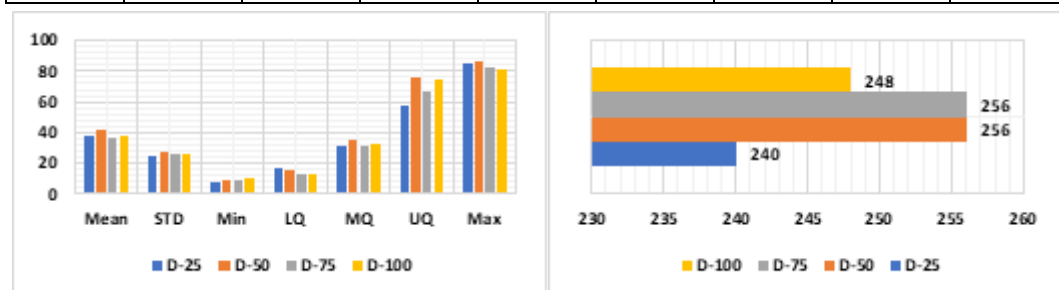

Figure S3: Performance Comparison of Delta/No. of Hits.r.t LR<sup>2</sup>A

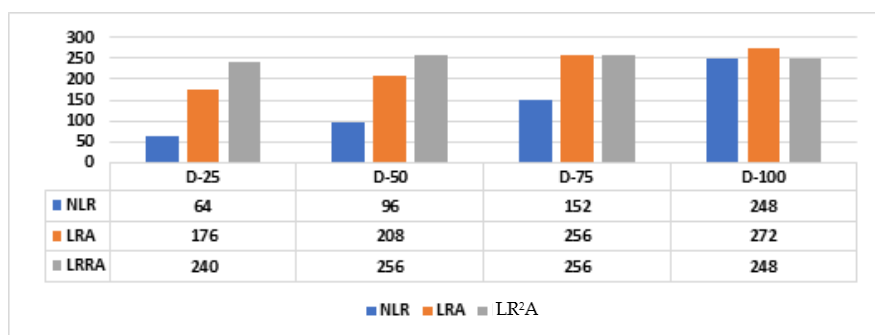

Figure S4: Performance comparison of NLR, LRA, LR<sup>2</sup>A with respect to Delta

The performance when the different radii of the aperture ranged from 50 pixels to 300 is presented next. The axial aberration associated with the aperture radii ranges from 25 mm to 100 mm with an increment of 25 mm. The design wavelengths associated with the axial aberration ranges from 400 nm to 700 nm with the increment of 50 nm. P50 corresponds to a radii of 50 pixels.

Table S4: Statistical Analysis of PSF Values with respect to NLR

| Radii | Hits | Mean | STD  | Min  | LQ   | MQ   | UQ   | Max  |
|-------|------|------|------|------|------|------|------|------|
| P50   | 40   | 29.8 | 5.2  | 24.9 | 25.7 | 26.6 | 33.9 | 37.8 |
| P75   | 40   | 22.2 | 2.1  | 19.2 | 20.7 | 22.2 | 24.3 | 24.8 |
| P100  | 80   | 11.8 | 4.5  | 4.8  | 9.4  | 11.3 | 12.5 | 21.6 |
| P125  | 88   | 21.9 | 18.9 | 5.6  | 7.4  | 9.2  | 47.8 | 55.4 |
| P150  | 88   | 22.4 | 21.9 | 7.3  | 8.6  | 9.6  | 30.2 | 73   |
| P175  | 64   | 25.6 | 21.7 | 8.1  | 8.3  | 13.8 | 37.9 | 67.4 |
| P200  | 48   | 27.2 | 21.8 | 7.8  | 9.9  | 19   | 39.4 | 68.2 |
| P225  | 56   | 21.3 | 20.8 | 7.1  | 9    | 13.5 | 24.8 | 70   |
| P250  | 40   | 23.7 | 21.9 | 9.4  | 10   | 15.5 | 17   | 66.6 |
| P275  | 32   | 24.1 | 20.8 | 10   | 11.7 | 13.4 | 25.7 | 59.5 |
| P300  | 32   | 25.1 | 18.6 | 8.8  | 12.7 | 18   | 30.5 | 55.7 |

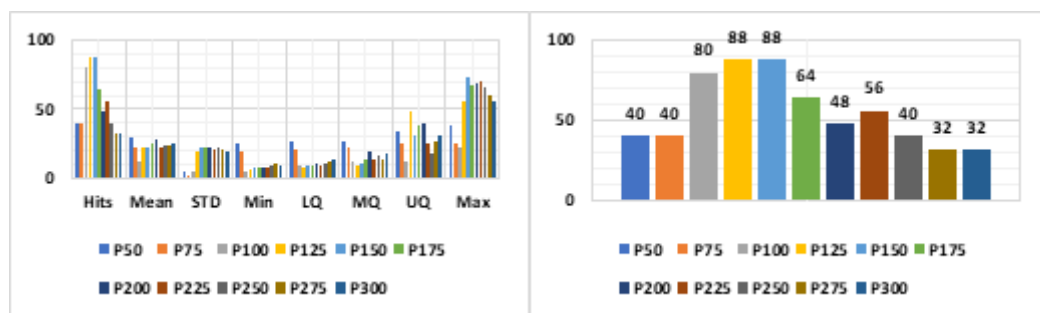

Figure S5: Performance Comparison of Hits with respect to NLR

Table S5: Statistical Analysis of PSF Values with respect to LRA

| PSF  | Hits | Mean | STD  | Min  | LQ   | MQ   | UQ   | Max  |
|------|------|------|------|------|------|------|------|------|
| P50  | 80   | 11.8 | 4.5  | 4.8  | 9.4  | 11.3 | 12.5 | 21.6 |
| P75  | 88   | 21.9 | 18.9 | 5.6  | 7.4  | 9.2  | 47.8 | 55.4 |
| P100 | 88   | 22.4 | 21.9 | 7.3  | 8.6  | 9.6  | 30.2 | 73   |
| P125 | 64   | 25.6 | 21.7 | 8.1  | 8.3  | 13.8 | 37.9 | 67.4 |
| P150 | 48   | 27.2 | 21.8 | 7.8  | 9.9  | 19   | 39.4 | 68.2 |
| P175 | 56   | 21.3 | 20.8 | 7.1  | 9    | 13.5 | 24.8 | 70   |
| P200 | 40   | 23.7 | 21.9 | 9.4  | 10   | 15.5 | 17   | 66.6 |
| P225 | 32   | 24.1 | 20.8 | 10   | 11.7 | 13.4 | 25.7 | 59.5 |
| P250 | 32   | 25.1 | 18.6 | 8.8  | 12.7 | 18   | 30.5 | 55.7 |
| P275 | 40   | 29.8 | 5.2  | 24.9 | 25.7 | 26.6 | 33.9 | 37.8 |
| P300 | 40   | 22.2 | 2.1  | 19.2 | 20.7 | 22.2 | 24.3 | 24.8 |

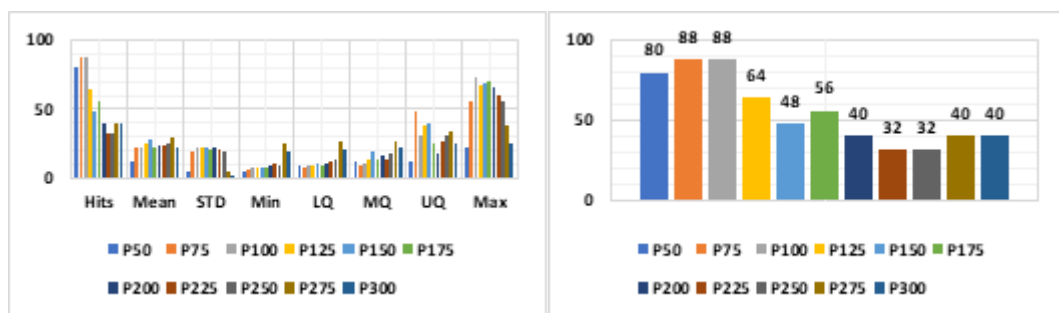

Figure S6: Performance Comparison of Hits with respect to LRA

Table S6: Statistical Analysis of PSF Values with respect to LR<sup>2</sup>A

| PSF  | Hits | Mean | STD  | Min  | LQ   | MQ   | UQ   | Max  |
|------|------|------|------|------|------|------|------|------|
| P50  | 8    | 15.8 | 15.8 | 15.8 | 15.8 | 15.8 | 15.8 | 15.8 |
| P75  | 72   | 18.8 | 12.2 | 7.9  | 9.4  | 12.7 | 28   | 39.7 |
| P100 | 136  | 36.2 | 23   | 13.2 | 17   | 26.7 | 51.1 | 77.2 |
| P125 | 136  | 38.5 | 26.2 | 11.8 | 15.1 | 31.5 | 74.3 | 81.6 |
| P150 | 128  | 42.3 | 26.8 | 12.6 | 15.6 | 38.4 | 76.5 | 81.7 |
| P175 | 120  | 45.1 | 28.2 | 11.2 | 12.9 | 37.2 | 77.6 | 82.9 |
| P200 | 144  | 35.7 | 23.6 | 11.6 | 15.5 | 32.5 | 56.9 | 79.6 |
| P225 | 128  | 46   | 26.6 | 9.9  | 21.3 | 46.6 | 71.2 | 84.7 |
| P250 | 120  | 42   | 28   | 10.7 | 14   | 34.1 | 78.1 | 86.7 |
| P275 | 120  | 43.7 | 27.2 | 8.3  | 23   | 35.1 | 78.4 | 82.1 |
| P300 | 112  | 36.5 | 25.4 | 8.4  | 15.5 | 23.7 | 66.2 | 77.8 |

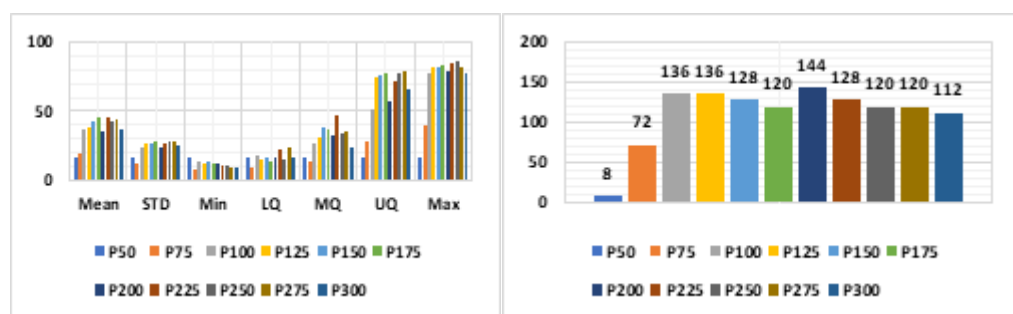

Figure S7: Performance Comparison of Hits with respect to LR<sup>2</sup>A

Taken together, these performance analysis figures S5, S6, and S7 suggest that the LR<sup>2</sup>A method evinced the most optimal performance in terms of hit values. The LR<sup>2</sup>A method likewise shone brightly, boasting a higher mean than NLR and a smaller standard deviation than both NLR and LRA. The NLR method, conversely, suffered the lowest mean and the widest standard deviation, indicating a lesser degree of consistency in performance across the delta values.

The utilization of image quality metrics plays a pivotal role in the evaluation of digital image quality, especially in the field of optics where the accuracy and quality of images are of utmost importance. Numerous metrics are available to quantify the image quality, such as pSNR, SSIM, FSIM, VIF, and RMSE, with each metric offering a distinct perspective on the image quality assessment, enabling us to assess the diverse facets of

image quality. We utilized the power of the above-mentioned metrics to validate the effectiveness of the system.

**Table S7:** Statistical analysis of peak signal-to-noise ratio (PSNR) with respect to deblurring

| PSNR              | Range/Values | Mean     | STD      | Min     | LQ      | MQ      | UQ      | Max     |
|-------------------|--------------|----------|----------|---------|---------|---------|---------|---------|
| LR <sup>2</sup> A | P100         | 17.74854 | 0.091352 | 17.6269 | 17.6883 | 17.739  | 17.8004 | 17.8881 |
|                   | P125         | 17.76634 | 0.101549 | 17.6558 | 17.6769 | 17.7278 | 17.8778 | 17.8934 |
|                   | P150         | 17.70294 | 0.039991 | 17.669  | 17.6799 | 17.6853 | 17.7014 | 17.7791 |
|                   | P175         | 17.65704 | 0.107786 | 17.4559 | 17.6727 | 17.674  | 17.7144 | 17.7682 |
|                   | P200         | 17.73004 | 0.071905 | 17.6064 | 17.715  | 17.7295 | 17.7989 | 17.8004 |
|                   | P225         | 17.69528 | 0.14212  | 17.4332 | 17.6963 | 17.7141 | 17.8099 | 17.8229 |
|                   | P25          | 16.05172 | 0.175861 | 15.7778 | 15.9927 | 16.0378 | 16.148  | 16.3023 |
|                   | P250         | 17.75808 | 0.10512  | 17.6554 | 17.6708 | 17.7353 | 17.7852 | 17.9437 |
|                   | P275         | 17.61372 | 0.171143 | 17.3811 | 17.4425 | 17.6908 | 17.7731 | 17.7811 |
|                   | P300         | 17.5467  | 0.232194 | 17.1965 | 17.3684 | 17.6352 | 17.7233 | 17.8101 |
|                   | P50          | 17.57936 | 0.139726 | 17.4034 | 17.4446 | 17.593  | 17.6984 | 17.7574 |
|                   | P75          | 17.82424 | 0.312741 | 17.3983 | 17.5188 | 17.9671 | 18.0533 | 18.1837 |
| LRA               | P100         | 17.6985  | 0.087683 | 17.5828 | 17.6076 | 17.7396 | 17.7663 | 17.7962 |
|                   | P125         | 17.71916 | 0.039808 | 17.6421 | 17.727  | 17.7337 | 17.7434 | 17.7496 |
|                   | P150         | 17.69312 | 0.012488 | 17.669  | 17.6946 | 17.699  | 17.7007 | 17.7023 |
|                   | P175         | 17.73666 | 0.186246 | 17.4916 | 17.697  | 17.7048 | 17.7271 | 18.0628 |
|                   | P200         | 17.71176 | 0.330071 | 17.1534 | 17.7021 | 17.7035 | 17.8369 | 18.1629 |
|                   | P225         | 17.68822 | 0.18987  | 17.3383 | 17.7018 | 17.7085 | 17.8091 | 17.8834 |
|                   | P25          | 15.74872 | 0.229865 | 15.3993 | 15.5947 | 15.7824 | 15.9714 | 15.9958 |
|                   | P250         | 17.75864 | 0.23908  | 17.3589 | 17.7046 | 17.7506 | 17.9216 | 18.0575 |
|                   | P275         | 17.33148 | 0.503872 | 16.4422 | 17.1336 | 17.6214 | 17.6759 | 17.7843 |
|                   | P300         | 17.38022 | 0.477727 | 16.4752 | 17.4165 | 17.5268 | 17.6707 | 17.8119 |
|                   | P50          | 17.34076 | 0.221501 | 17.0116 | 17.2622 | 17.2938 | 17.4704 | 17.6658 |
|                   | P75          | 17.7701  | 0.129552 | 17.6164 | 17.6508 | 17.7934 | 17.8167 | 17.9732 |
| NLR               | P100         | 15.94376 | 0.027169 | 15.8995 | 15.9282 | 15.9539 | 15.9631 | 15.9741 |
|                   | P125         | 15.86102 | 0.13376  | 15.6198 | 15.8201 | 15.9316 | 15.9663 | 15.9673 |
|                   | P150         | 15.72036 | 0.259741 | 15.2828 | 15.5921 | 15.8145 | 15.9352 | 15.9772 |
|                   | P175         | 15.54926 | 0.393462 | 14.8981 | 15.3546 | 15.6504 | 15.8701 | 15.9731 |
|                   | P200         | 15.33504 | 0.594791 | 14.2968 | 15.1545 | 15.4789 | 15.7839 | 15.9611 |
|                   | P225         | 15.12146 | 0.765164 | 13.8022 | 14.8447 | 15.3336 | 15.6819 | 15.9449 |
|                   | P25          | 12.92562 | 0.412457 | 12.3489 | 12.6348 | 12.9288 | 13.2189 | 13.4967 |
|                   | P250         | 14.8652  | 0.984277 | 13.2202 | 14.3649 | 15.2423 | 15.5745 | 15.9241 |
|                   | P275         | 14.71732 | 1.109914 | 12.8911 | 14.0948 | 15.1682 | 15.5114 | 15.9211 |
|                   | P300         | 14.66412 | 1.116753 | 12.911  | 13.9053 | 15.1126 | 15.4717 | 15.92   |
|                   | P50          | 15.59262 | 0.090502 | 15.4588 | 15.5352 | 15.5988 | 15.6572 | 15.7131 |
|                   | P75          | 15.89214 | 0.053975 | 15.8192 | 15.8506 | 15.8916 | 15.9332 | 15.9661 |

|                   |       |          |          |         |          |          |          |         |
|-------------------|-------|----------|----------|---------|----------|----------|----------|---------|
| LR <sup>2</sup> A | D-25  | 17.54262 | 0.401266 | 16.3023 | 17.55305 | 17.65045 | 17.72442 | 17.9437 |
|                   | D-50  | 17.51184 | 0.460782 | 16.148  | 17.39783 | 17.67385 | 17.7359  | 17.9671 |
|                   | D-75  | 17.62915 | 0.509218 | 15.9927 | 17.68195 | 17.7333  | 17.8212  | 18.0533 |
|                   | D-100 | 17.63333 | 0.576956 | 15.7778 | 17.70758 | 17.76525 | 17.8133  | 18.1837 |
| LRA               | D-25  | 17.50261 | 0.537048 | 15.9714 | 17.32718 | 17.6599  | 17.78728 | 18.0628 |
|                   | D-50  | 17.49096 | 0.56874  | 15.7824 | 17.37792 | 17.73525 | 17.79733 | 17.9216 |
|                   | D-75  | 17.53038 | 0.598383 | 15.5947 | 17.61175 | 17.70345 | 17.74985 | 17.9732 |
|                   | D-100 | 17.50658 | 0.640409 | 15.3993 | 17.66948 | 17.6994  | 17.70378 | 17.8167 |
| NLR               | D-25  | 14.99195 | 0.871531 | 13.2189 | 14.29738 | 15.25455 | 15.69793 | 15.9631 |
|                   | D-50  | 15.34378 | 0.787729 | 12.9288 | 15.22378 | 15.53885 | 15.83378 | 15.9741 |
|                   | D-75  | 15.48088 | 0.880195 | 12.6348 | 15.52925 | 15.7329  | 15.88638 | 15.9673 |
|                   | D-100 | 15.59524 | 0.993479 | 12.3489 | 15.8948  | 15.92615 | 15.9624  | 15.9772 |

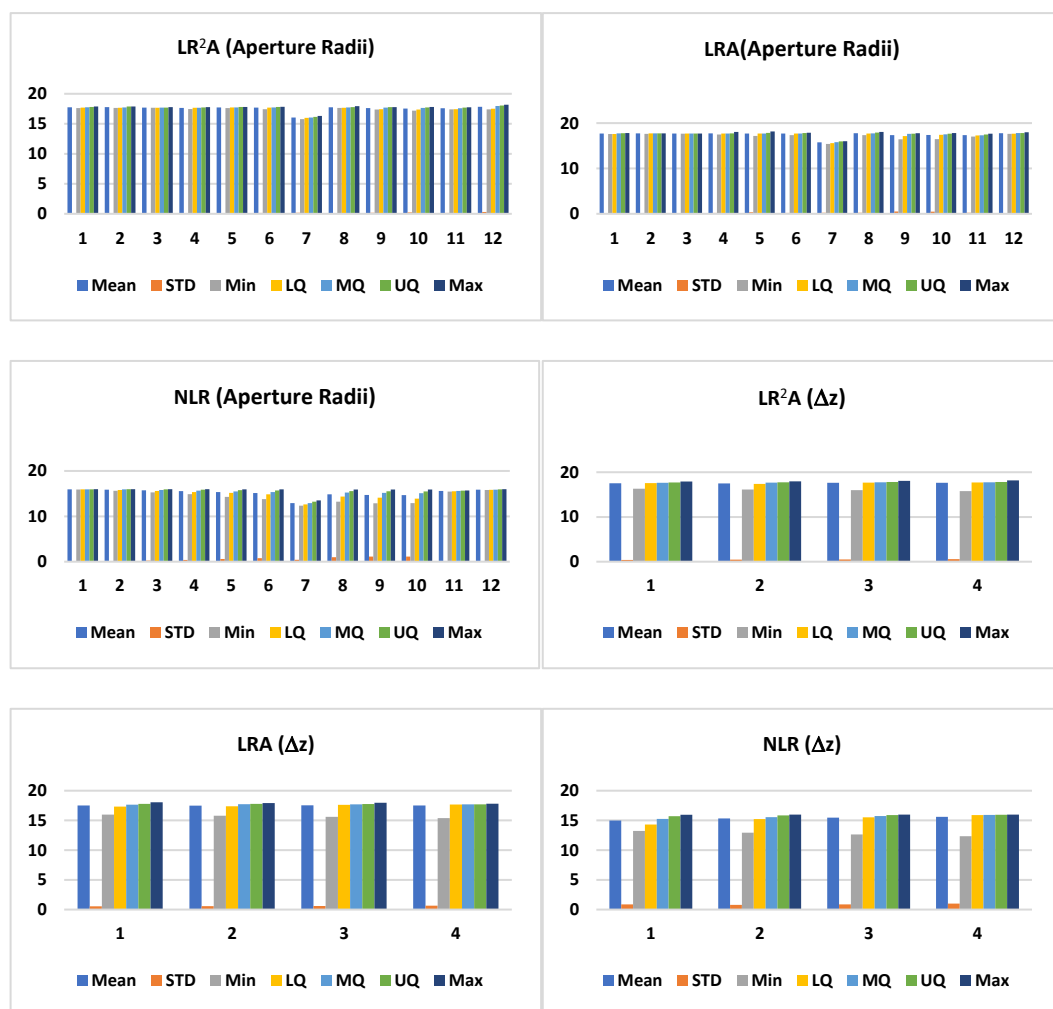

**Figure S8:** Graphical Plot Analysis of Peak signal-to-noise ratio (PSNR) with respect to deblurring

The Statistical Analysis of Table S7. represents the PSNR value with respect to deblurring and Graphical Plot Analysis of Fig S8 represents the Deblurring with respect to PSNR.

**Table S8:** Statistical Analysis of similarity index measure (SSIM) with respect to deblurring

| SSIM              | Range/Values | Mean     | STD      | Min    | LQ       | MQ      | UQ       | Max    |
|-------------------|--------------|----------|----------|--------|----------|---------|----------|--------|
| LR <sup>2</sup> A | P100         | 0.60332  | 0.003091 | 0.5981 | 0.6021   | 0.6046  | 0.6047   | 0.6071 |
|                   | P125         | 0.60856  | 0.000515 | 0.6079 | 0.6082   | 0.6086  | 0.6087   | 0.6094 |
|                   | P150         | 0.60652  | 0.003134 | 0.6004 | 0.6075   | 0.6076  | 0.6084   | 0.6087 |
|                   | P175         | 0.60418  | 0.004624 | 0.5982 | 0.599    | 0.6077  | 0.6078   | 0.6082 |
|                   | P200         | 0.6033   | 0.004683 | 0.597  | 0.5986   | 0.6052  | 0.6076   | 0.6081 |
|                   | P225         | 0.59984  | 0.007867 | 0.5888 | 0.5931   | 0.6014  | 0.6075   | 0.6084 |
|                   | P25          | 0.40426  | 0.007485 | 0.3948 | 0.3982   | 0.4034  | 0.41     | 0.4149 |
|                   | P250         | 0.6009   | 0.00661  | 0.5898 | 0.5996   | 0.6001  | 0.6071   | 0.6079 |
|                   | P275         | 0.59402  | 0.011908 | 0.5764 | 0.5883   | 0.5913  | 0.6063   | 0.6078 |
|                   | P300         | 0.59624  | 0.009771 | 0.5848 | 0.5855   | 0.5978  | 0.6051   | 0.608  |
|                   | P50          | 0.51144  | 0.010089 | 0.4982 | 0.5052   | 0.5124  | 0.5133   | 0.5281 |
|                   | P75          | 0.58034  | 0.005762 | 0.5732 | 0.579    | 0.5794  | 0.5794   | 0.5907 |
| LRA               | P100         | 0.60148  | 0.003461 | 0.5962 | 0.599    | 0.6025  | 0.6043   | 0.6054 |
|                   | P125         | 0.60738  | 0.000412 | 0.6066 | 0.6074   | 0.6075  | 0.6077   | 0.6077 |
|                   | P150         | 0.5989   | 0.018079 | 0.5632 | 0.6076   | 0.6077  | 0.6077   | 0.6083 |
|                   | P175         | 0.59292  | 0.018324 | 0.5683 | 0.5734   | 0.6074  | 0.6075   | 0.608  |
|                   | P200         | 0.58582  | 0.018185 | 0.5654 | 0.5695   | 0.5802  | 0.6069   | 0.6071 |
|                   | P225         | 0.57996  | 0.025098 | 0.5514 | 0.552    | 0.5823  | 0.6069   | 0.6072 |
|                   | P25          | 0.39028  | 0.010316 | 0.3758 | 0.3829   | 0.3905  | 0.3979   | 0.4043 |
|                   | P250         | 0.5829   | 0.022363 | 0.5486 | 0.5715   | 0.5811  | 0.6063   | 0.607  |
|                   | P275         | 0.56338  | 0.037375 | 0.5035 | 0.5461   | 0.5649  | 0.5956   | 0.6068 |
|                   | P300         | 0.5632   | 0.036502 | 0.5067 | 0.5449   | 0.5617  | 0.5961   | 0.6066 |
|                   | P50          | 0.50888  | 0.010544 | 0.4958 | 0.4994   | 0.5083  | 0.5179   | 0.523  |
|                   | P75          | 0.57944  | 0.006522 | 0.5697 | 0.576    | 0.5795  | 0.5833   | 0.5887 |
| NLR               | P100         | 0.45426  | 0.004626 | 0.4456 | 0.4539   | 0.4561  | 0.4577   | 0.458  |
|                   | P125         | 0.45142  | 0.016476 | 0.4234 | 0.4436   | 0.4577  | 0.4656   | 0.4668 |
|                   | P150         | 0.44248  | 0.027609 | 0.4004 | 0.4233   | 0.4488  | 0.4662   | 0.4737 |
|                   | P175         | 0.43338  | 0.034172 | 0.3887 | 0.4039   | 0.4339  | 0.4626   | 0.4778 |
|                   | P200         | 0.42544  | 0.038108 | 0.3793 | 0.394    | 0.4181  | 0.4556   | 0.4802 |
|                   | P225         | 0.41814  | 0.040336 | 0.3723 | 0.3866   | 0.4054  | 0.4457   | 0.4807 |
|                   | P25          | 0.34872  | 0.008164 | 0.3374 | 0.3429   | 0.3488  | 0.3543   | 0.3602 |
|                   | P250         | 0.41144  | 0.042485 | 0.3634 | 0.38     | 0.3981  | 0.4353   | 0.4804 |
|                   | P275         | 0.40738  | 0.04369  | 0.3575 | 0.3769   | 0.394   | 0.4286   | 0.4799 |
|                   | P300         | 0.40576  | 0.043385 | 0.3576 | 0.3759   | 0.3918  | 0.424    | 0.4795 |
|                   | P50          | 0.41594  | 0.005124 | 0.4087 | 0.4128   | 0.4157  | 0.4191   | 0.4234 |
|                   | P75          | 0.44264  | 0.004031 | 0.4366 | 0.4401   | 0.4429  | 0.4459   | 0.4477 |
| LR <sup>2</sup> A | D-25         | 0.575583 | 0.054563 | 0.4149 | 0.588325 | 0.5974  | 0.60085  | 0.6086 |
|                   | D-50         | 0.5753   | 0.058043 | 0.4034 | 0.583975 | 0.60075 | 0.605775 | 0.6079 |



|     |       |          |          |        |          |         |          |        |
|-----|-------|----------|----------|--------|----------|---------|----------|--------|
|     | D-75  | 0.578742 | 0.061697 | 0.3982 | 0.596325 | 0.6067  | 0.608125 | 0.6094 |
|     | D-100 | 0.577333 | 0.063269 | 0.3948 | 0.591875 | 0.60765 | 0.607925 | 0.6087 |
| LRA | D-25  | 0.556008 | 0.054912 | 0.3979 | 0.5458   | 0.56845 | 0.58855  | 0.6083 |
|     | D-50  | 0.564508 | 0.059151 | 0.3905 | 0.5641   | 0.58065 | 0.60375  | 0.608  |
|     | D-75  | 0.57435  | 0.065071 | 0.3829 | 0.5907   | 0.60265 | 0.60725  | 0.6077 |
|     | D-100 | 0.57445  | 0.067816 | 0.3758 | 0.589575 | 0.6067  | 0.606925 | 0.6077 |
|     |       |          |          |        |          |         |          |        |
| NLR | D-25  | 0.404783 | 0.030956 | 0.3543 | 0.379225 | 0.39895 | 0.428375 | 0.4539 |
|     | D-50  | 0.417742 | 0.031233 | 0.3488 | 0.397075 | 0.4169  | 0.444375 | 0.4577 |
|     | D-75  | 0.43645  | 0.032931 | 0.3429 | 0.42745  | 0.4429  | 0.45915  | 0.4662 |
|     | D-100 | 0.454817 | 0.041531 | 0.3374 | 0.451225 | 0.47575 | 0.479975 | 0.4807 |

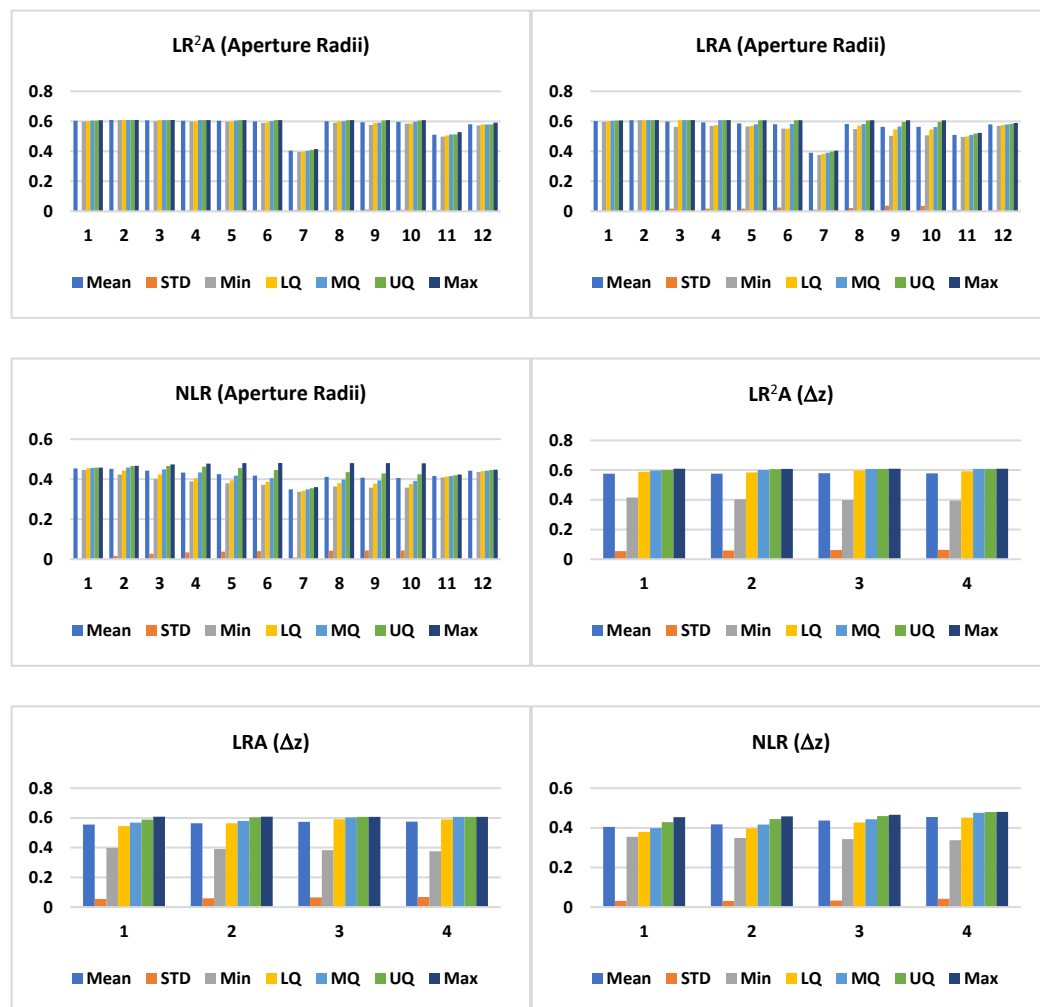

**Figure S9:** Graphical Plot Analysis of structural similarity index measure (SSIM) with respect to deblurring

The Statistical Analysis of Table S8. represents the SSIM value with respect to deblurring and Graphical Plot Analysis of Fig. S9 represents the Deblurring with respect to SSIM.

**Table S9:** Statistical Analysis of Visual information fidelity (VIF) with respect to deblurring

| VIF               | Range | Mean     | STD      | Min    | LQ       | MQ      | UQ       | Max    |
|-------------------|-------|----------|----------|--------|----------|---------|----------|--------|
| LR <sup>2</sup> A | P100  | 0.2522   | 0.006342 | 0.242  | 0.2489   | 0.2542  | 0.2556   | 0.2603 |
|                   | P125  | 0.26268  | 0.000796 | 0.2614 | 0.2624   | 0.2626  | 0.2634   | 0.2636 |
|                   | P150  | 0.26064  | 0.004848 | 0.2511 | 0.2627   | 0.2628  | 0.2628   | 0.2638 |
|                   | P175  | 0.25844  | 0.006375 | 0.2478 | 0.2546   | 0.2629  | 0.2633   | 0.2636 |
|                   | P200  | 0.25478  | 0.007528 | 0.2459 | 0.2482   | 0.2529  | 0.2631   | 0.2638 |
|                   | P225  | 0.25274  | 0.010039 | 0.2397 | 0.2437   | 0.253   | 0.2628   | 0.2645 |
|                   | P25   | 0.13286  | 0.003391 | 0.1278 | 0.1308   | 0.1332  | 0.135    | 0.1375 |
|                   | P250  | 0.25474  | 0.007649 | 0.2443 | 0.2493   | 0.2537  | 0.2621   | 0.2643 |
|                   | P275  | 0.24588  | 0.014492 | 0.2251 | 0.2354   | 0.2468  | 0.2578   | 0.2643 |
|                   | P300  | 0.24744  | 0.011994 | 0.2335 | 0.2361   | 0.2463  | 0.2569   | 0.2644 |
|                   | P50   | 0.16658  | 0.006476 | 0.1598 | 0.1624   | 0.1649  | 0.1675   | 0.1783 |
|                   | P75   | 0.22092  | 0.006891 | 0.2123 | 0.2181   | 0.2187  | 0.2227   | 0.2328 |
| LRA               | P100  | 0.25436  | 0.004607 | 0.2475 | 0.2511   | 0.2552  | 0.258    | 0.26   |
|                   | P125  | 0.2627   | 0.000725 | 0.2614 | 0.2626   | 0.2628  | 0.2633   | 0.2634 |
|                   | P150  | 0.2535   | 0.020407 | 0.2132 | 0.2635   | 0.2635  | 0.2636   | 0.2637 |
|                   | P175  | 0.24624  | 0.021484 | 0.2164 | 0.2245   | 0.2631  | 0.2634   | 0.2638 |
|                   | P200  | 0.23794  | 0.021325 | 0.2148 | 0.2181   | 0.2311  | 0.2627   | 0.263  |
|                   | P225  | 0.2334   | 0.026364 | 0.2031 | 0.2062   | 0.2321  | 0.2627   | 0.2629 |
|                   | P25   | 0.1332   | 0.002596 | 0.1287 | 0.1322   | 0.1343  | 0.1348   | 0.136  |
|                   | P250  | 0.23372  | 0.025131 | 0.1988 | 0.2179   | 0.2283  | 0.2606   | 0.263  |
|                   | P275  | 0.21888  | 0.033196 | 0.1718 | 0.2001   | 0.2121  | 0.2475   | 0.2629 |
|                   | P300  | 0.21776  | 0.032691 | 0.1751 | 0.1964   | 0.2083  | 0.246    | 0.263  |
|                   | P50   | 0.17502  | 0.007111 | 0.1672 | 0.168    | 0.174   | 0.1808   | 0.1851 |
|                   | P75   | 0.22946  | 0.006697 | 0.2202 | 0.2255   | 0.2288  | 0.2332   | 0.2396 |
| NLR               | P100  | 0.21652  | 0.004275 | 0.2088 | 0.2155   | 0.2181  | 0.2197   | 0.2205 |
|                   | P125  | 0.2186   | 0.015689 | 0.192  | 0.2113   | 0.2239  | 0.2319   | 0.2339 |
|                   | P150  | 0.21278  | 0.027463 | 0.1707 | 0.1936   | 0.22    | 0.2362   | 0.2434 |
|                   | P175  | 0.20598  | 0.034667 | 0.1589 | 0.1773   | 0.2079  | 0.2362   | 0.2496 |
|                   | P200  | 0.19928  | 0.039976 | 0.149  | 0.1671   | 0.1934  | 0.2314   | 0.2555 |
|                   | P225  | 0.1938   | 0.042989 | 0.1451 | 0.157    | 0.1838  | 0.2239   | 0.2592 |
|                   | P25   | 0.13402  | 0.003527 | 0.1286 | 0.1318   | 0.1348  | 0.1364   | 0.1385 |
|                   | P250  | 0.18718  | 0.045171 | 0.1374 | 0.1496   | 0.1749  | 0.2153   | 0.2587 |
|                   | P275  | 0.18358  | 0.046485 | 0.1324 | 0.147    | 0.1701  | 0.209    | 0.2594 |
|                   | P300  | 0.18178  | 0.046345 | 0.1332 | 0.145    | 0.1669  | 0.2044   | 0.2594 |
|                   | P50   | 0.17538  | 0.004944 | 0.1683 | 0.1721   | 0.1754  | 0.179    | 0.1821 |
|                   | P75   | 0.20278  | 0.003022 | 0.1978 | 0.2013   | 0.2034  | 0.2055   | 0.2059 |
| LR <sup>2</sup> A | D-25  | 0.232217 | 0.038176 | 0.1375 | 0.23845  | 0.24655 | 0.250875 | 0.2634 |
|                   | D-50  | 0.23255  | 0.040299 | 0.1308 | 0.231225 | 0.25295 | 0.2563   | 0.2629 |
|                   | D-75  | 0.238083 | 0.042846 | 0.1332 | 0.2412   | 0.25995 | 0.2636   | 0.2638 |

|     |       |          |          |        |          |         |          |        |
|-----|-------|----------|----------|--------|----------|---------|----------|--------|
|     | D-100 | 0.2381   | 0.043641 | 0.135  | 0.234575 | 0.26295 | 0.2643   | 0.2645 |
| LRA | D-25  | 0.215833 | 0.035962 | 0.1343 | 0.199175 | 0.21635 | 0.2394   | 0.2635 |
|     | D-50  | 0.224567 | 0.037413 | 0.1348 | 0.21115  | 0.22995 | 0.2571   | 0.2638 |
|     | D-75  | 0.237142 | 0.041237 | 0.1322 | 0.240875 | 0.25585 | 0.2627   | 0.2637 |
|     | D-100 | 0.2389   | 0.043354 | 0.1287 | 0.240675 | 0.2629  | 0.263    | 0.2636 |
| NLR | D-25  | 0.173692 | 0.02666  | 0.1364 | 0.14895  | 0.1722  | 0.196575 | 0.2155 |
|     | D-50  | 0.189583 | 0.025866 | 0.1348 | 0.1737   | 0.1886  | 0.210925 | 0.2239 |
|     | D-75  | 0.209433 | 0.029425 | 0.1318 | 0.203625 | 0.2175  | 0.231525 | 0.2362 |
|     | D-100 | 0.227658 | 0.04087  | 0.1286 | 0.213025 | 0.2465  | 0.258825 | 0.2594 |

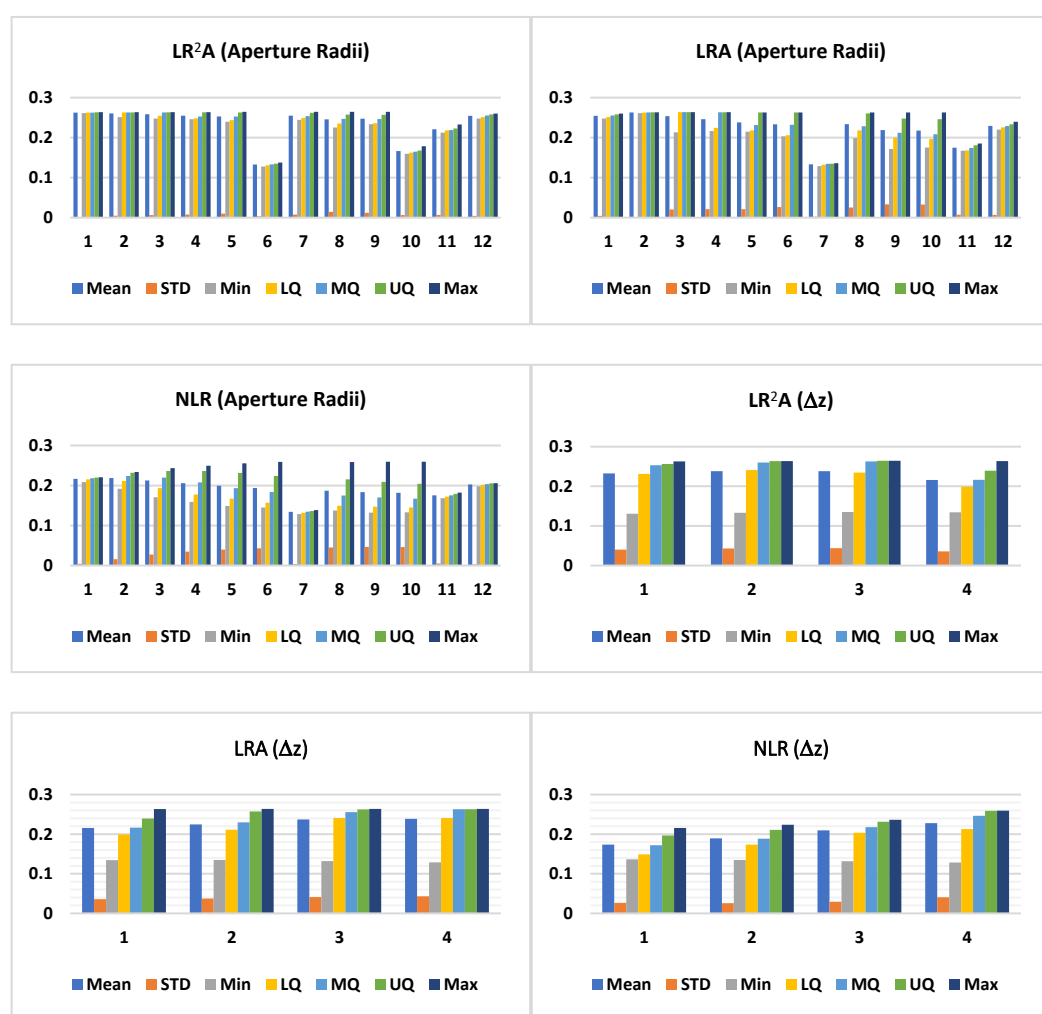

**Figure S10:** Graphical Plot Analysis of Visual information fidelity (VIF) with respect to deblurring

The Statistical Analysis of Table S9. represents the VIF value with respect to deblurring and Graphical Plot Analysis of Fig. S10 represents the Deblurring with respect to VIF.

**Table S10:** Statistical Analysis of Feature Similarity Index (FSIM) w.r.t deblurring

| FSIM | Range | Mean | STD | Min | LQ | MQ | UQ | Max |
|------|-------|------|-----|-----|----|----|----|-----|
|------|-------|------|-----|-----|----|----|----|-----|

|                   |       |          |          |        |          |         |          |        |
|-------------------|-------|----------|----------|--------|----------|---------|----------|--------|
| LR <sup>2</sup> A | P100  | 0.7594   | 0.001252 | 0.7574 | 0.7587   | 0.7597  | 0.7603   | 0.7609 |
|                   | P125  | 0.76058  | 0.000251 | 0.7603 | 0.7603   | 0.7606  | 0.7608   | 0.7609 |
|                   | P150  | 0.76024  | 0.000304 | 0.7597 | 0.7602   | 0.7603  | 0.7604   | 0.7606 |
|                   | P175  | 0.7601   | 0.000808 | 0.7586 | 0.7603   | 0.7603  | 0.7603   | 0.761  |
|                   | P200  | 0.75914  | 0.000985 | 0.7579 | 0.7583   | 0.759   | 0.7602   | 0.7603 |
|                   | P225  | 0.75852  | 0.002188 | 0.7544 | 0.7586   | 0.7591  | 0.7601   | 0.7604 |
|                   | P25   | 0.62674  | 0.007535 | 0.6173 | 0.6201   | 0.6269  | 0.6318   | 0.6376 |
|                   | P250  | 0.75916  | 0.001147 | 0.7572 | 0.7588   | 0.7593  | 0.7601   | 0.7604 |
|                   | P275  | 0.75744  | 0.003309 | 0.7513 | 0.7574   | 0.7581  | 0.7601   | 0.7603 |
|                   | P300  | 0.7584   | 0.001838 | 0.7551 | 0.7579   | 0.7592  | 0.7596   | 0.7602 |
|                   | P50   | 0.70482  | 0.009208 | 0.6926 | 0.6989   | 0.7035  | 0.7102   | 0.7189 |
|                   | P75   | 0.7466   | 0.005216 | 0.7395 | 0.7435   | 0.7461  | 0.7492   | 0.7547 |
| LRA               | P100  | 0.75822  | 0.001405 | 0.7558 | 0.7577   | 0.7587  | 0.7591   | 0.7598 |
|                   | P125  | 0.76078  | 0.000402 | 0.7603 | 0.7606   | 0.7607  | 0.7608   | 0.7615 |
|                   | P150  | 0.75768  | 0.006961 | 0.744  | 0.7605   | 0.7607  | 0.7608   | 0.7624 |
|                   | P175  | 0.75486  | 0.006913 | 0.7464 | 0.7466   | 0.7604  | 0.7604   | 0.7605 |
|                   | P200  | 0.7506   | 0.009326 | 0.7374 | 0.7429   | 0.7521  | 0.7603   | 0.7603 |
|                   | P225  | 0.74886  | 0.011484 | 0.7349 | 0.7358   | 0.7531  | 0.7602   | 0.7603 |
|                   | P25   | 0.61162  | 0.006536 | 0.6043 | 0.6051   | 0.6111  | 0.6167   | 0.6209 |
|                   | P250  | 0.74978  | 0.010207 | 0.7352 | 0.7414   | 0.7517  | 0.7602   | 0.7604 |
|                   | P275  | 0.74372  | 0.015915 | 0.7159 | 0.738    | 0.7499  | 0.7546   | 0.7602 |
|                   | P300  | 0.74062  | 0.017155 | 0.7131 | 0.731    | 0.7446  | 0.7541   | 0.7603 |
|                   | P50   | 0.69588  | 0.011129 | 0.681  | 0.6871   | 0.6962  | 0.7035   | 0.7116 |
|                   | P75   | 0.74216  | 0.005209 | 0.7353 | 0.738    | 0.7422  | 0.7457   | 0.7496 |
| NLR               | P100  | 0.671    | 0.004685 | 0.6623 | 0.6703   | 0.6732  | 0.6744   | 0.6748 |
|                   | P125  | 0.67068  | 0.015878 | 0.6439 | 0.6628   | 0.6766  | 0.6841   | 0.686  |
|                   | P150  | 0.66484  | 0.025752 | 0.6263 | 0.646    | 0.6705  | 0.6873   | 0.6941 |
|                   | P175  | 0.65852  | 0.031311 | 0.6181 | 0.6312   | 0.6583  | 0.6858   | 0.6992 |
|                   | P200  | 0.65262  | 0.034976 | 0.6111 | 0.6231   | 0.6452  | 0.681    | 0.7027 |
|                   | P225  | 0.64716  | 0.037424 | 0.6053 | 0.6172   | 0.6349  | 0.6735   | 0.7049 |
|                   | P25   | 0.59012  | 0.005373 | 0.5828 | 0.5863   | 0.5899  | 0.5938   | 0.5978 |
|                   | P250  | 0.64194  | 0.039245 | 0.5992 | 0.6121   | 0.6276  | 0.6653   | 0.7055 |
|                   | P275  | 0.6397   | 0.039453 | 0.5985 | 0.6098   | 0.6248  | 0.6595   | 0.7059 |
|                   | P300  | 0.63924  | 0.038637 | 0.6016 | 0.6089   | 0.624   | 0.6559   | 0.7058 |
|                   | P50   | 0.63274  | 0.004286 | 0.6267 | 0.63     | 0.6326  | 0.6355   | 0.6389 |
|                   | P75   | 0.6589   | 0.003158 | 0.654  | 0.6569   | 0.6595  | 0.6616   | 0.6625 |
| LR <sup>2</sup> A | D-25  | 0.743525 | 0.036475 | 0.6318 | 0.7552   | 0.75825 | 0.759775 | 0.7609 |
|                   | D-50  | 0.742567 | 0.03835  | 0.6269 | 0.75495  | 0.75905 | 0.75985  | 0.7606 |
|                   | D-75  | 0.741842 | 0.040651 | 0.6201 | 0.7549   | 0.7601  | 0.7603   | 0.7604 |
|                   | D-100 | 0.74075  | 0.041939 | 0.6173 | 0.752925 | 0.7602  | 0.7603   | 0.7604 |

|     |       |          |          |        |          |         |          |        |
|-----|-------|----------|----------|--------|----------|---------|----------|--------|
| LRA | D-25  | 0.732683 | 0.038419 | 0.6167 | 0.733925 | 0.74355 | 0.75385  | 0.7624 |
|     | D-50  | 0.736    | 0.041445 | 0.6111 | 0.742725 | 0.7508  | 0.759125 | 0.7607 |
|     | D-75  | 0.738275 | 0.045142 | 0.6051 | 0.750075 | 0.75895 | 0.760425 | 0.7607 |
|     | D-100 | 0.738267 | 0.046289 | 0.6043 | 0.750675 | 0.76025 | 0.7603   | 0.7608 |
| NLR | D-25  | 0.631025 | 0.023698 | 0.5938 | 0.611525 | 0.62715 | 0.6499   | 0.6703 |
|     | D-50  | 0.643192 | 0.024802 | 0.5899 | 0.6269   | 0.64005 | 0.66225  | 0.6766 |
|     | D-75  | 0.6617   | 0.027813 | 0.5863 | 0.65665  | 0.6694  | 0.681775 | 0.6873 |
|     | D-100 | 0.6784   | 0.037507 | 0.5828 | 0.6684   | 0.69665 | 0.70505  | 0.7059 |

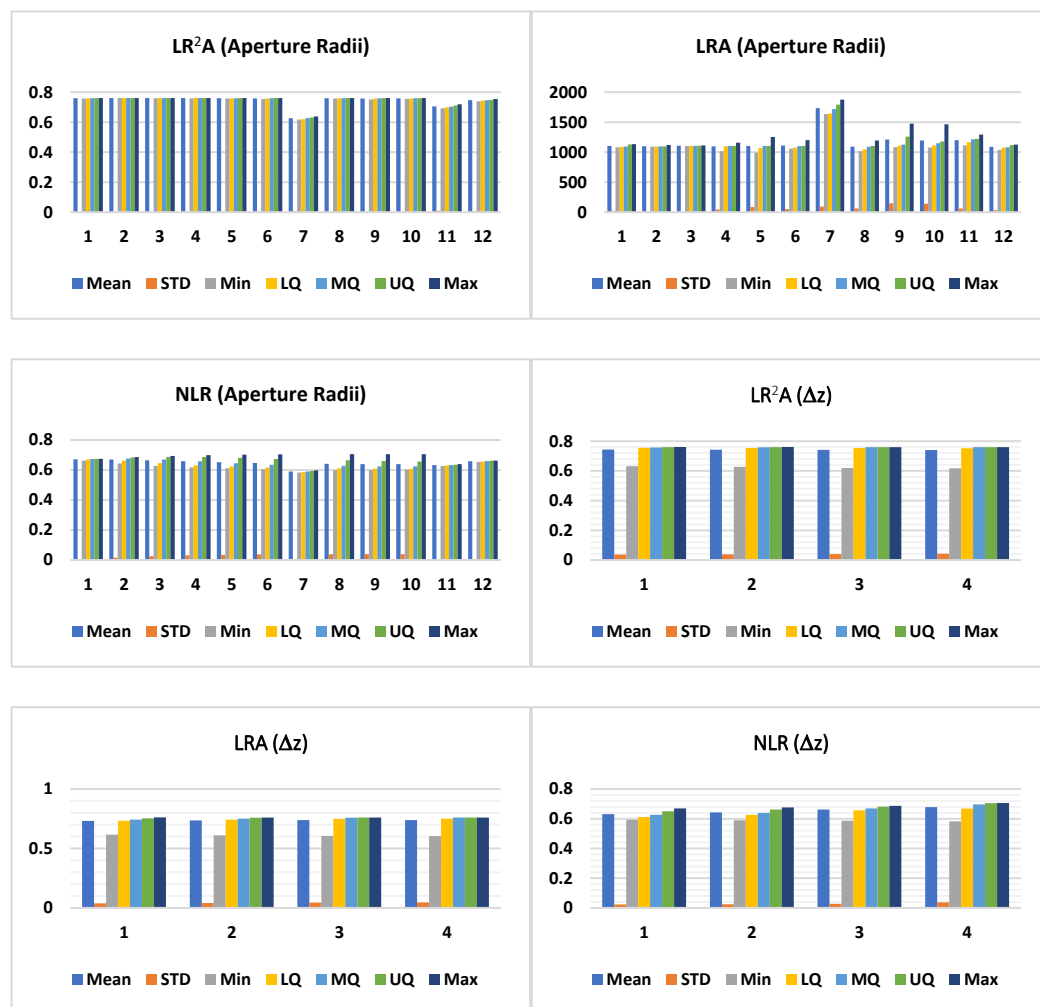

**Figure S11:** Graphical Plot Analysis of Feature Similarity Index (FSIM) with respect to deblurring

The Statistical Analysis of Table S10. represents the FSIM value with respect to deblurring and Graphical Plot Analysis of Fig. S11 represents the Deblurring with respect to FSIM.

**Table S11.** Statistical Analysis of Root-mean-square deviation (RMSE) with respect to deblurring .

| RMSE              | Range | Mean     | STD      | Min      | LQ       | MQ       | UQ       | Max      |
|-------------------|-------|----------|----------|----------|----------|----------|----------|----------|
| LR <sup>2</sup> A | P100  | 33.04746 | 0.347161 | 32.51899 | 32.84895 | 33.08194 | 33.27565 | 33.51178 |
|                   | P125  | 32.98002 | 0.384956 | 32.49903 | 32.55729 | 33.12446 | 33.31909 | 33.4002  |
|                   | P150  | 33.21981 | 0.152472 | 32.92955 | 33.22535 | 33.28688 | 33.30782 | 33.34944 |
|                   | P175  | 33.39807 | 0.417275 | 32.97085 | 33.17554 | 33.33047 | 33.33547 | 34.17801 |
|                   | P200  | 33.1171  | 0.274948 | 32.84879 | 32.8546  | 33.11796 | 33.17327 | 33.5909  |
|                   | P225  | 33.2531  | 0.548755 | 32.76368 | 32.8129  | 33.17675 | 33.24475 | 34.2674  |
|                   | P25   | 40.18287 | 0.81485  | 39.03224 | 39.73211 | 40.23921 | 40.44894 | 41.46185 |
|                   | P250  | 33.0116  | 0.397458 | 32.3114  | 32.90651 | 33.09583 | 33.34257 | 33.40167 |
|                   | P275  | 33.56892 | 0.663576 | 32.92199 | 32.95231 | 33.26612 | 34.23064 | 34.47354 |
|                   | P300  | 33.83423 | 0.909058 | 32.81223 | 33.14183 | 33.47941 | 34.52388 | 35.21381 |
|                   | P50   | 33.6998  | 0.542343 | 33.01172 | 33.23693 | 33.64268 | 34.22245 | 34.3852  |
|                   | P75   | 32.77956 | 1.186274 | 31.4306  | 31.90631 | 32.22425 | 33.93121 | 34.40541 |
| LRA               | P100  | 33.23817 | 0.336072 | 32.86478 | 32.97789 | 33.07973 | 33.58624 | 33.68223 |
|                   | P125  | 33.15789 | 0.152375 | 33.04137 | 33.06529 | 33.10225 | 33.12764 | 33.45289 |
|                   | P150  | 33.25712 | 0.047808 | 33.22213 | 33.22811 | 33.23461 | 33.25123 | 33.3495  |
|                   | P175  | 33.09806 | 0.704927 | 31.87117 | 33.12706 | 33.21222 | 33.24236 | 34.0375  |
|                   | P200  | 33.20933 | 1.27301  | 31.5063  | 32.71115 | 33.21746 | 33.22263 | 35.38911 |
|                   | P225  | 33.28368 | 0.73557  | 32.53658 | 32.81613 | 33.19817 | 33.22369 | 34.64383 |
|                   | P25   | 41.6152  | 1.106208 | 40.43414 | 40.54809 | 41.43982 | 42.34514 | 43.30882 |
|                   | P250  | 33.01937 | 0.915092 | 31.8907  | 32.39353 | 33.0379  | 33.21298 | 34.56173 |
|                   | P275  | 34.72877 | 2.06585  | 32.9097  | 33.32303 | 33.53278 | 35.4698  | 38.40852 |
|                   | P300  | 34.52895 | 1.961429 | 32.80536 | 33.34303 | 33.89986 | 34.33341 | 38.26311 |
|                   | P50   | 34.64501 | 0.883453 | 33.36198 | 34.12075 | 34.82185 | 34.94863 | 35.97182 |
|                   | P75   | 32.96727 | 0.49062  | 32.20195 | 32.78708 | 32.87544 | 33.41962 | 33.55227 |
| NLR               | P100  | 40.67752 | 0.127426 | 40.53525 | 40.58696 | 40.62976 | 40.75046 | 40.88516 |
|                   | P125  | 41.0714  | 0.637157 | 40.56734 | 40.57186 | 40.73417 | 41.26073 | 42.22288 |
|                   | P150  | 41.75549 | 1.261242 | 40.5212  | 40.71761 | 41.28716 | 42.35777 | 43.89373 |
|                   | P175  | 42.61037 | 1.955456 | 40.53992 | 41.02354 | 42.07477 | 43.53222 | 45.8814  |
|                   | P200  | 43.73187 | 3.072617 | 40.59619 | 41.43298 | 42.9135  | 44.54663 | 49.17005 |
|                   | P225  | 44.88947 | 4.078091 | 40.672   | 41.92225 | 43.63763 | 46.16415 | 52.05131 |
|                   | P25   | 57.64173 | 2.737291 | 53.91432 | 55.66685 | 57.55745 | 59.53896 | 61.53107 |
|                   | P250  | 46.35129 | 5.435827 | 40.76934 | 42.44404 | 44.09886 | 48.78583 | 55.6584  |
|                   | P275  | 47.22958 | 6.253811 | 40.78336 | 42.75346 | 44.47625 | 50.32715 | 57.80771 |
|                   | P300  | 47.52235 | 6.280227 | 40.78851 | 42.94944 | 44.76199 | 51.43675 | 57.67508 |
|                   | P50   | 42.35776 | 0.44173  | 41.77186 | 42.04189 | 42.32543 | 42.63654 | 43.01306 |
|                   | P75   | 40.92044 | 0.254232 | 40.57264 | 40.72688 | 40.9222  | 41.11576 | 41.26469 |
| LR <sup>2</sup> A | D-25  | 33.87549 | 1.653615 | 32.3114  | 33.13749 | 33.42113 | 33.79886 | 39.03224 |
|                   | D-50  | 34.0075  | 1.906938 | 32.22425 | 33.09389 | 33.33083 | 34.40729 | 39.73211 |
|                   | D-75  | 33.5631  | 2.131769 | 31.90631 | 32.7707  | 33.10389 | 33.30001 | 40.44894 |

|     |       |          |          |          |          |          |          |          |
|-----|-------|----------|----------|----------|----------|----------|----------|----------|
|     | D-100 | 33.56448 | 2.441261 | 31.4306  | 32.8001  | 32.98202 | 33.20167 | 41.46185 |
| LRA | D-25  | 34.06132 | 2.226    | 31.87117 | 32.89847 | 33.38456 | 34.68833 | 40.54809 |
|     | D-50  | 34.11606 | 2.402366 | 32.39353 | 32.86062 | 33.09617 | 34.48722 | 41.43982 |
|     | D-75  | 33.97098 | 2.577608 | 32.20195 | 33.0405  | 33.21743 | 33.57014 | 42.34514 |
|     | D-100 | 34.07759 | 2.803616 | 32.78708 | 33.21634 | 33.23303 | 33.34776 | 43.30882 |
| NLR | D-25  | 45.61948 | 4.719348 | 40.58696 | 41.8466  | 44.03942 | 49.17116 | 55.66685 |
|     | D-50  | 43.77705 | 4.413854 | 40.53525 | 41.19592 | 42.61947 | 44.1932  | 57.55745 |
|     | D-75  | 43.14431 | 5.039722 | 40.56734 | 40.94706 | 41.67762 | 42.66577 | 59.53896 |
|     | D-100 | 42.65014 | 5.760656 | 40.5212  | 40.59011 | 40.7599  | 40.90756 | 61.53107 |

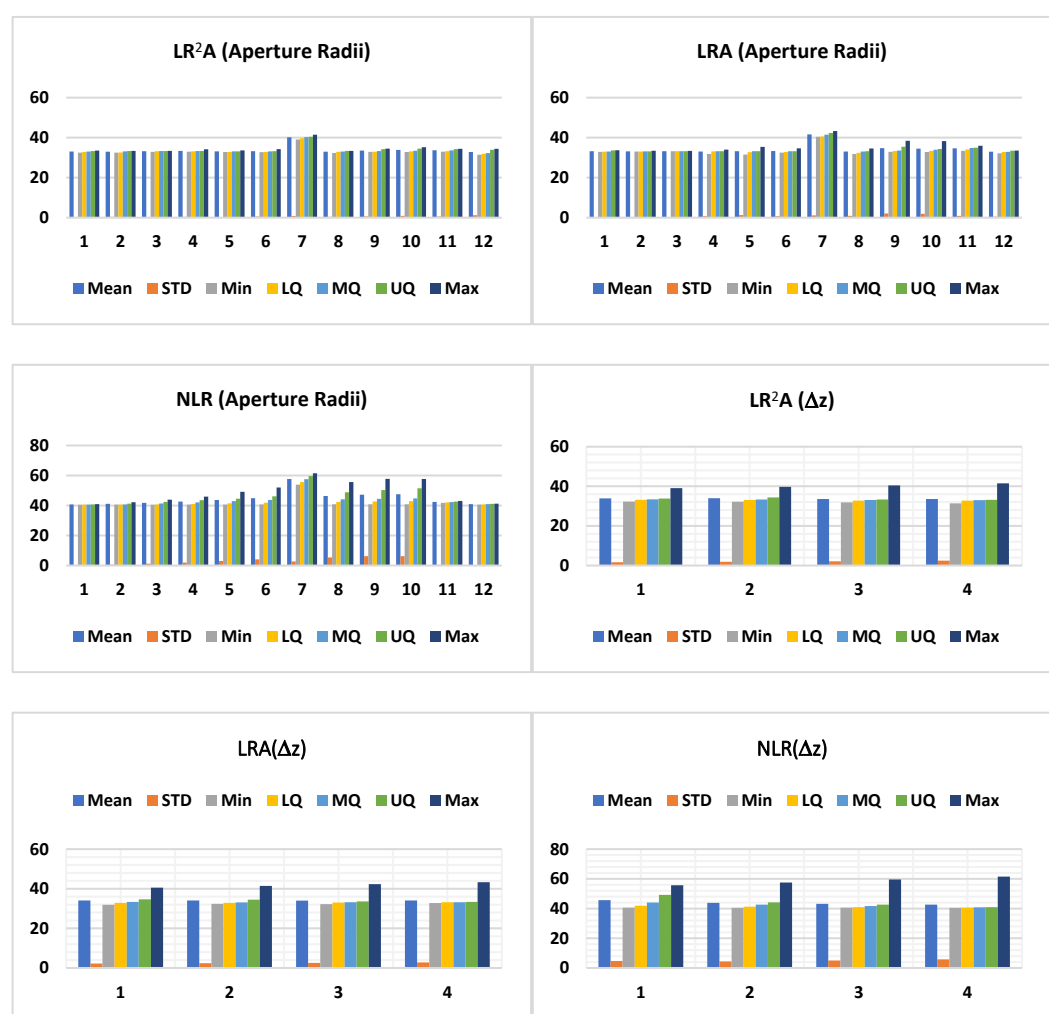

**Figure S12:** Graphical Plot Analysis of Root-mean-square deviation (RMSE) with respect to deblurring.

The performance measures based on aperture radii and axial aberrations were evaluated on different pre-trained deep learning networks and compared. To determine the best-performing models with descriptive statistics, image quality metrics such as PSNR, SSIM, FSI, and VIF were also used to evaluate the similarity between the ground truth and the reconstructed images. PSNR and SSIM measure pixel-level differences between the original and processed images, while FSI and VIF focus on the visual quality of the image.

**Table S12:** Overall Performance comparison w.r.t Image Similarity Metrics

| Method            | Range/Values | PSNR Mean         | SSIM Mean        | VIF Mean         | FSIM Mean       | RMSE Mean        |
|-------------------|--------------|-------------------|------------------|------------------|-----------------|------------------|
| LR <sup>2</sup> A | P100         | 17.74854          | 0.60332          | 0.2522           | 0.7594          | 33.04746         |
|                   | P125         | 17.76634          | 0.60856          | 0.26268          | 0.76058         | 32.98002         |
|                   | P150         | 17.70294          | 0.60652          | 0.26064          | 0.76024         | 33.21981         |
|                   | P175         | 17.65704          | 0.60418          | 0.25844          | 0.7601          | 33.39807         |
|                   | P200         | 17.73004          | 0.6033           | 0.25478          | 0.75914         | 33.1171          |
|                   | P225         | 17.69528          | 0.59984          | 0.25274          | 0.75852         | 33.2531          |
|                   | P25          | 16.05172          | 0.40426          | 0.13286          | 0.62674         | 40.18287         |
|                   | P250         | 17.75808          | 0.6009           | 0.25474          | 0.75916         | 33.0116          |
|                   | P275         | 17.61372          | 0.59402          | 0.24588          | 0.75744         | 33.56892         |
|                   | P300         | 17.5467           | 0.59624          | 0.24744          | 0.7584          | 33.83423         |
|                   | P50          | 17.57936          | 0.51144          | 0.16658          | 0.70482         | 33.6998          |
|                   | P75          | 17.82424          | 0.58034          | 0.22092          | 0.7466          | 32.77956         |
|                   | AVG          | <b>17.5561667</b> | <b>0.5760767</b> | <b>0.2341583</b> | <b>0.742595</b> | <b>33.841045</b> |
| LRA               | P100         | 17.6985           | 0.60148          | 0.25436          | 0.75822         | 33.23817         |
|                   | P125         | 17.71916          | 0.60738          | 0.2627           | 0.76078         | 33.15789         |
|                   | P150         | 17.69312          | 0.5989           | 0.2535           | 0.75768         | 33.25712         |
|                   | P175         | 17.73666          | 0.59292          | 0.24624          | 0.75486         | 33.09806         |
|                   | P200         | 17.71176          | 0.58582          | 0.23794          | 0.7506          | 33.20933         |
|                   | P225         | 17.68822          | 0.57996          | 0.2334           | 0.74886         | 33.28368         |
|                   | P25          | 15.74872          | 0.39028          | 0.1332           | 0.61162         | 41.6152          |
|                   | P250         | 17.75864          | 0.5829           | 0.23372          | 0.74978         | 33.01937         |
|                   | P275         | 17.33148          | 0.56338          | 0.21888          | 0.74372         | 34.72877         |
|                   | P300         | 17.38022          | 0.5632           | 0.21776          | 0.74062         | 34.52895         |
|                   | P50          | 17.34076          | 0.50888          | 0.17502          | 0.69588         | 34.64501         |
|                   | P75          | 17.7701           | 0.57944          | 0.22946          | 0.74216         | 32.96727         |
|                   | AVG          | <b>17.4647783</b> | <b>0.5628783</b> | <b>0.2246817</b> | <b>0.734565</b> | <b>34.229068</b> |
| NLR               | P100         | 15.94376          | 0.45426          | 0.21652          | 0.671           | 40.67752         |
|                   | P125         | 15.86102          | 0.45142          | 0.2186           | 0.67068         | 41.0714          |
|                   | P150         | 15.72036          | 0.44248          | 0.21278          | 0.66484         | 41.75549         |
|                   | P175         | 15.54926          | 0.43338          | 0.20598          | 0.65852         | 42.61037         |
|                   | P200         | 15.33504          | 0.42544          | 0.19928          | 0.65262         | 43.73187         |
|                   | P225         | 15.12146          | 0.41814          | 0.1938           | 0.64716         | 44.88947         |
|                   | P25          | 12.92562          | 0.34872          | 0.13402          | 0.59012         | 57.64173         |
|                   | P250         | 14.8652           | 0.41144          | 0.18718          | 0.64194         | 46.35129         |
|                   | P275         | 14.71732          | 0.40738          | 0.18358          | 0.6397          | 47.22958         |
|                   | P300         | 14.66412          | 0.40576          | 0.18178          | 0.63924         | 47.52235         |
|                   | P50          | 15.59262          | 0.41594          | 0.17538          | 0.63274         | 42.35776         |



|                        |       |                   |                  |                |                  |                  |
|------------------------|-------|-------------------|------------------|----------------|------------------|------------------|
|                        | P75   | 15.89214          | 0.44264          | 0.20278        | 0.6589           | 40.92044         |
|                        | AVG   | <b>15.1823267</b> | <b>0.4214167</b> | <b>0.19264</b> | <b>0.6472883</b> | <b>44.729939</b> |
| <b>LR<sup>2</sup>A</b> | D-25  | 17.54262          | 0.575583         | 0.232217       | 0.743525         | 33.87549         |
|                        | D-50  | 17.51184          | 0.5753           | 0.23255        | 0.742567         | 34.0075          |
|                        | D-75  | 17.62915          | 0.578742         | 0.238083       | 0.741842         | 33.5631          |
|                        | D-100 | 17.63333          | 0.577333         | 0.2381         | 0.74075          | 33.56448         |
|                        | AVG   | 17.579235         | 0.5767395        | 0.2352375      | 0.742171         | 33.752643        |
| <b>LRA</b>             | D-25  | 17.50261          | 0.556008         | 0.215833       | 0.732683         | 34.06132         |
|                        | D-50  | 17.49096          | 0.564508         | 0.224567       | 0.736            | 34.11606         |
|                        | D-75  | 17.53038          | 0.57435          | 0.237142       | 0.738275         | 33.97098         |
|                        | D-100 | 17.50658          | 0.57445          | 0.2389         | 0.738267         | 34.07759         |
|                        | AVG   | 17.5076325        | 0.567329         | 0.2291105      | 0.7363063        | 34.056488        |
| <b>NLR</b>             | D-25  | 14.99195          | 0.404783         | 0.173692       | 0.631025         | 45.61948         |
|                        | D-50  | 15.34378          | 0.417742         | 0.189583       | 0.643192         | 43.77705         |
|                        | D-75  | 15.48088          | 0.43645          | 0.209433       | 0.6617           | 43.14431         |
|                        | D-100 | 15.59524          | 0.454817         | 0.227658       | 0.6784           | 42.65014         |
|                        | AVG   | 15.3529625        | 0.428448         | 0.2000915      | 0.6535793        | 43.797745        |

The Statistical Analysis of Table S11. represents the RMSE value with respect to deblurring and Graphical Plot Analysis of Fig. S12 represents the Deblurring with respect to RMSE.

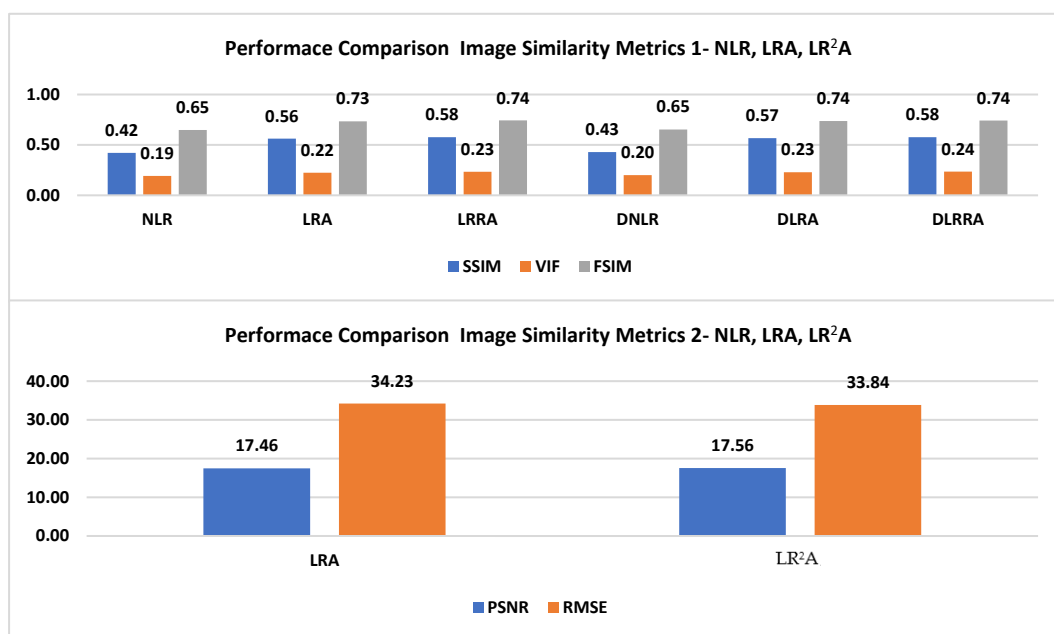

**Figure S13:** Graphical Plot Analysis of Performance Comparison - NLR, LRA, LR<sup>2</sup>A

**Table S13:** Performance comparison of Pre-trained Deep Learning models for NLR

| Pre-trained_Models | Hits | Mean | STD | Min | LQ   | MQ   | UQ   | Max  |
|--------------------|------|------|-----|-----|------|------|------|------|
| EFNETB0            | 64   | 9.1  | 0.9 | 7.3 | 8.6  | 9.5  | 9.9  | 10   |
| IRV2               | 24   | 8.7  | 0.7 | 7.8 | 7.8  | 9    | 9.4  | 9.4  |
| NNL                | 168  | 39.3 | 25  | 4.8 | 12.5 | 48.9 | 59.5 | 73   |
| RS101              | 264  | 19.6 | 10  | 6.8 | 11.1 | 19.9 | 24.9 | 47.8 |
| RN50               | 88   | 11.5 | 3   | 7.6 | 9.2  | 10.1 | 14.5 | 17   |

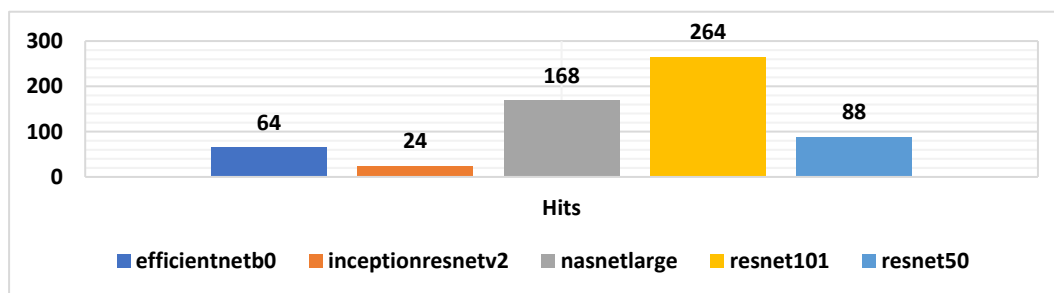

**Figure S14:** Graphical Plot Hit Analysis of Pre-trained Models Performance Comparison for NLR

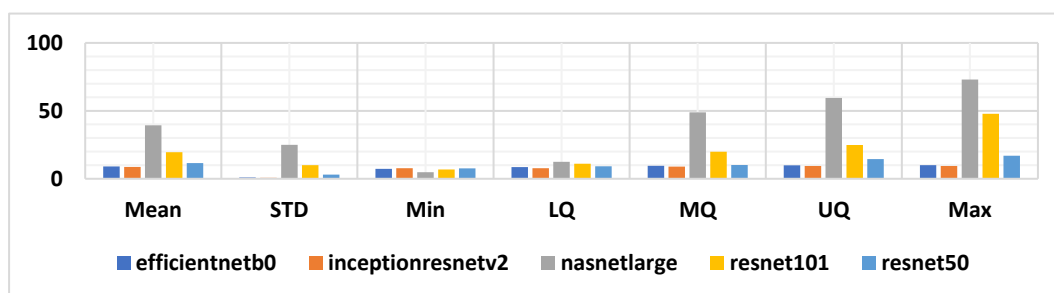

**Figure S15:** Descriptive Statistical Analysis of Pre-trained Models Performance Comparison for NLR

**Table S14:** Performance comparison of Pre-trained Deep Learning models for LRA

| Pre-trained_Models | Hits | Mean | STD  | Min  | LQ   | MQ   | UQ   | Max  |
|--------------------|------|------|------|------|------|------|------|------|
| DN53               | 40   | 24.2 | 8.7  | 11.2 | 18.2 | 25.9 | 30.3 | 35.4 |
| EFNETB0            | 304  | 15.6 | 2.5  | 7.4  | 14.3 | 15.3 | 17.1 | 21.8 |
| IRV2               | 296  | 38.8 | 7.8  | 20.8 | 35.8 | 38.3 | 40.5 | 65.5 |
| NNMB               | 336  | 72.2 | 18.4 | 18.1 | 77.5 | 79.2 | 80.7 | 83.7 |
| RS101              | 80   | 15.9 | 4.7  | 12.6 | 13.3 | 13.9 | 15.8 | 28   |
| RN50               | 8    | 15.1 | 0    | 15.1 | 15.1 | 15.1 | 15.1 | 15.1 |

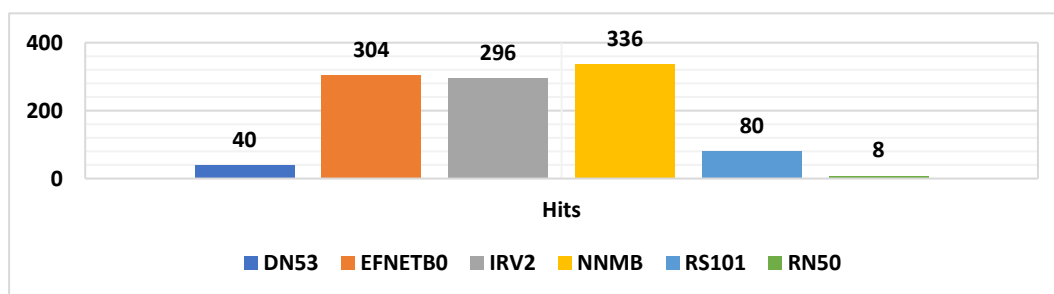

**Figure S16:** Graphical Plot Hit Analysis of Pre-trained Models Performance Comparison for LRA

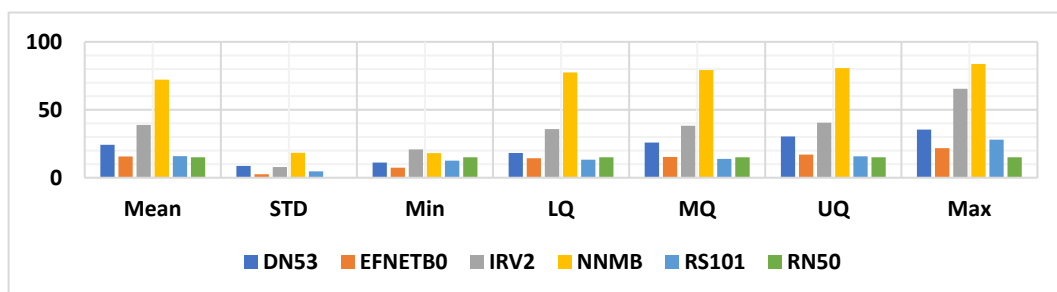

**Figure S17:** Descriptive Statistical Analysis of Pre-trained Models Performance Comparison for

LRA

**Table S15:** Performance comparison of Pre-trained Deep Learning models for LR<sup>2</sup>A

| Pre-trained_Models | Hits | Mean | STD  | Min  | LQ   | MQ   | UQ   | Max  |
|--------------------|------|------|------|------|------|------|------|------|
| DN53               | 64   | 19.3 | 6.1  | 7.9  | 15.7 | 19.2 | 23.8 | 27.8 |
| EFNETB0            | 368  | 15   | 5.6  | 8.3  | 11.8 | 13.2 | 16.2 | 34.5 |
| IRV2               | 352  | 37.1 | 12.9 | 12.8 | 31.7 | 35.2 | 38.1 | 75.5 |
| NNL                | 368  | 73.5 | 10.5 | 39.7 | 73.2 | 77.5 | 80.6 | 86.7 |
| NNMB               | 8    | 10   | 10   | 10   | 10   | 10   | 10   | 10   |
| RS101              | 32   | 16.5 | 3    | 12.7 | 15   | 16.1 | 17.6 | 21   |
| RN50               | 32   | 12.9 | 0.7  | 12.3 | 12.5 | 12.7 | 13.2 | 14   |

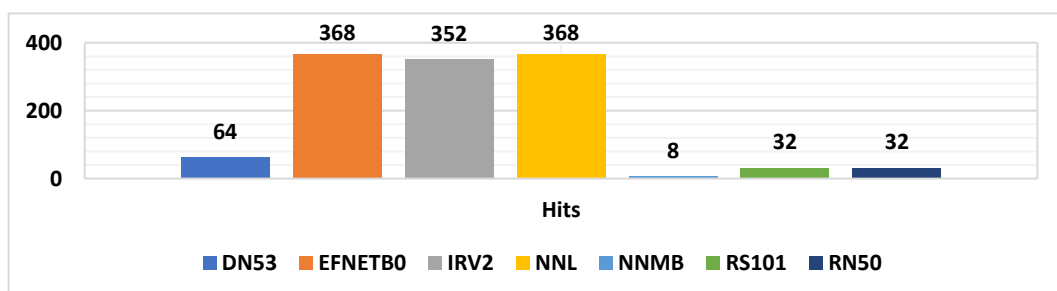

**Figure S18:** Graphical Plot Hit Analysis of Pre-trained Models Performance Comparison for LR<sup>2</sup>A

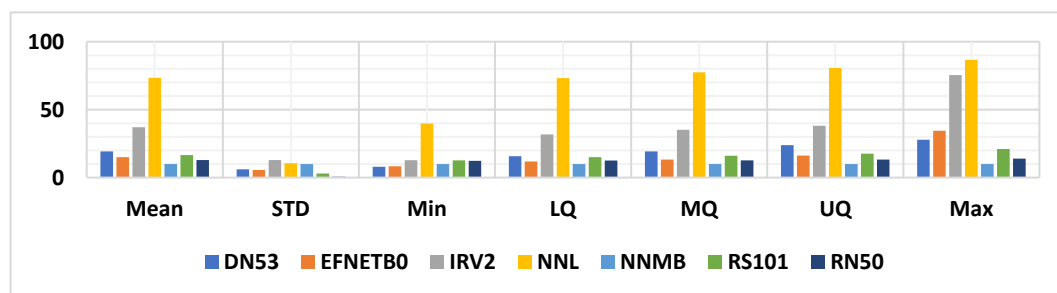

**Figure S19:** Descriptive Statistical Analysis of Pre-trained Models Performance Comparison for

LR<sup>2</sup>A

The NNL pre-trained model performed well with NLR method (mean=39.315) (Table S13), However, in the case of the LRA method, the NNMB model performed well with (mean=72.180) (Table S14), and the NNL model performed the best on average in the LR<sup>2</sup>A method (mean=73.550) (Table S15).

DN53 was the only model that appeared in all three methods. NLR had the lowest mean values across all models (mean=88.258), and NNMB had the highest mean value in LRA (mean=72.180) but the lowest in LR<sup>2</sup>A (mean=10.008). IRV2 had a relatively high mean value in both NLR (mean=8.747) and LRA (mean=38.763), while RS101 and RN50 had relatively consistent mean values across all methods.

The LR<sup>2</sup>A method (figure. s18, s19) outperformed the LRA and NLR methods in total hits, with 1160, 1056, and 608 hits, respectively. However, the LR<sup>2</sup>A method had the lowest mean value (154.91) and the highest standard deviation (45.17), indicating more variability in performance. The NLR method had the lowest standard deviation (39.56)(fig. s15) . The LR<sup>2</sup>A method also had the highest minimum value (78.73) and maximum value (234.48). The median values were relatively close for all three methods, with LRA having the highest median value (172.56) (figure. s17), followed by LR<sup>2</sup>A (155.01) and NLR (97.38).

**Disclaimer/Publisher's Note:** The statements, opinions, and data contained in all publications are solely those of the individual author(s) and contributor(s) and not of MDPI and/or the editor(s). MDPI and/or the editor(s) disclaim responsibility for any injury to people or property resulting from any ideas, methods, instructions, or products referred to in the content.
